# Supplementary material
Source: Elsevier journal article supplement (https://www.sciencedirect.com/science/article/pii/S0021755721001121)

**JPED-D-21-00145 – Supplementary Material**

**Figure S1 - Tag-cloud with 10-most cited terms regarding participant’s reason for altered sleep habits.**


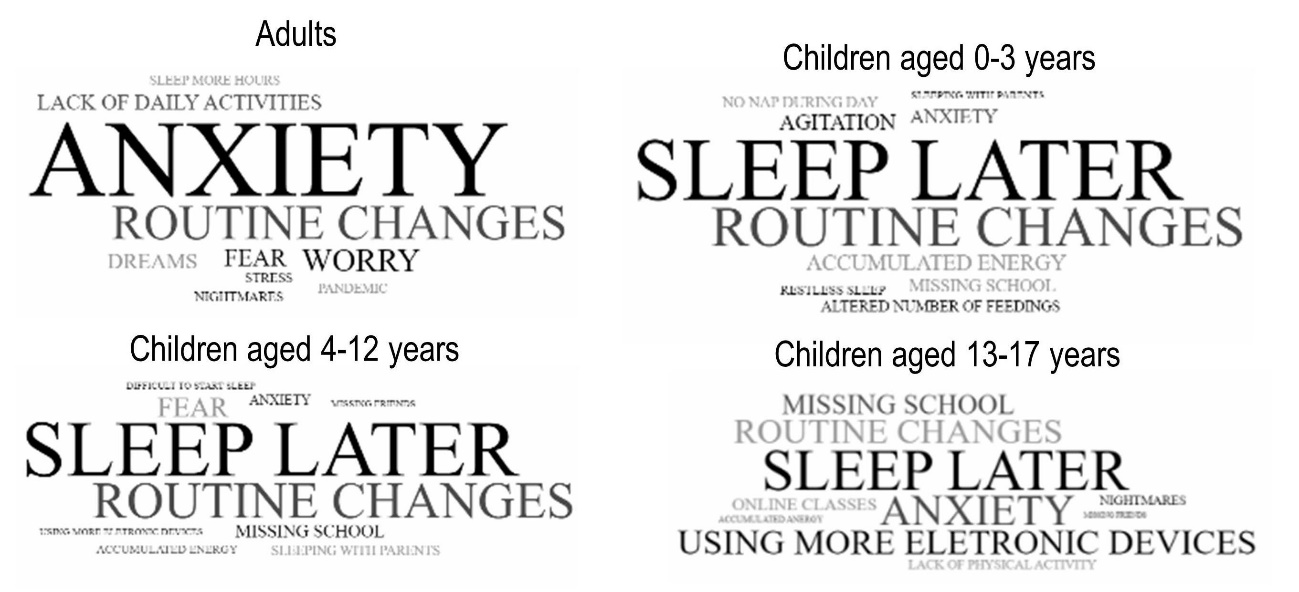

Supplement: mmc1 [file S0021755721001121:mmc1.docx]
